# Supplementary material for: Enhancement of photoelectrocatalytic performance of copper cobaltate nanoflowers modified with 5,10,15,20-tetrakis(4-carboxylphenyl)porphyrin for methanol oxidation under light
Source: Royal Society of Chemistry journal article supplement (doi:10.1039/d2dt04098k), 2023-01-01
Supplement: d2dt04098k1.pdf [file d2dt04098k1.pdf]

**Enhancement of Photoelectrocatalytic Performance of Copper Cobaltate Nanoflowers Modified with 5,10,15,20-Tetrakis (4-carboxylphenyl) Porphyrin for Methanol Oxidation under Light**

**Shu Li, Haoran Wang, Yuanhao Li, Hui Yang, Xixi Zhu, Qijing Bu\* and Qingyun Liu\***

*College of Chemical and Biological Engineering, Shandong University of Science and Technology, Qingdao 266590, China*

**Corresponding Author**

\* E-mail: Qingyun Liu\*: [qyliu@sdust.edu.cn](mailto:qyliu@sdust.edu.cn)

## **Characterization**

Scanning electron microscopy (SEM, JEOL, Japan) and transmission electron microscopy (TEM, JEOL, Japan) were used to determine the microstructure and morphology of the nanocomposites. The physical phases of the electrocatalysts were characterized by powder X-ray diffraction (XRD) (D/Max2500PC, Rigaku). The valence states of the elements in the catalyst were analyzed by X-ray photoelectron spectroscopy (XPS) (Thermo ESCALAB 250Xi, America). Fourier transform infrared (FT-IR, NICOLET 380, USA) was used to determine the composition of the catalyst. The Brunauer-Emmett-Teller surface areas of nanoparticles were performed at 77 K on a fully automatic specific surface area and porosity analyzer (MIKE Micromeritics ASAP2460).

## **Electrochemical tests**

The electrochemical tests were implemented by a typical three-electrode system. A platinum foil (3 cm × 3 cm), a saturated calomel electrode (SCE) and a modified glass carbon electrode (GCE) (3 mm in diameter) were used as the counter electrode, the reference electrode and the working electrode, respectively.

The catalyst inks were gained as follows: 50  $\mu\text{L}$  of nafion solution (5 wt%) and 4 mg of the synthesized catalyst were added into 950  $\mu\text{L}$  of ethanol to form a homogeneous suspension by ultrasonication. Then, the ink (3  $\mu\text{L}$ ) was dropped on the surface of the working electrode and dried naturally at ambient temperature. The loading capacity of the catalysts (0.17 mg  $\text{cm}^{-2}$ ) was kept constant for all the samples in order to comparatively investigate. The current densities of MOR were calculated according to

the geometric area of the GCE.

Cyclic voltammograms (CVs) the linear scanning voltammetry (LSV) curves were performed in N<sub>2</sub>-saturated KOH solution with and without CH<sub>3</sub>OH at the scan rate of 50 mV s<sup>-1</sup>, and the electrochemical active surface areas (ECSAs) of catalyst samples were obtained from the double-layer capacitance (C<sub>dl</sub>) in the CVs. Moreover, impedance spectroscopy (EIS) was carried out using SCE (frequency 0.1 Hz-100 kHz) at the potential 0.5 V. I-t tests and the CVs for 500 cycles were conducted for evaluating the electrochemical durability of the materials.

The working electrode was irradiated through a xenon lamp (300W) for photo-electrochemical measurements.

### **Reagents and chemicals**

Cobalt (II) chloride hexahydrate (CoCl<sub>2</sub>•6H<sub>2</sub>O), Copper (II) chloride dihydrate (CuCl<sub>2</sub>•2H<sub>2</sub>O) were commercially available from Aladdin Biochemical Technology Co., Ltd. Potassium hydroxide (KOH) was procured from Macklin (Shanghai, China). Urea (CH<sub>4</sub>N<sub>2</sub>O), ammonium fluoride (NH<sub>4</sub>F), ethanol (C<sub>2</sub>H<sub>5</sub>OH), ethanediol (C<sub>2</sub>H<sub>6</sub>O<sub>2</sub>), isopropanol (C<sub>3</sub>H<sub>8</sub>O), glycerol (C<sub>3</sub>H<sub>8</sub>O<sub>3</sub>) and methanol (CH<sub>3</sub>OH) were purchased from China Beijing chemical Reagent Co., Ltd. Nafion solution (5 wt% aqueous solution) was purchased from Suzhou Sinero Technology Co., Ltd. H<sub>2</sub>TCPP was synthesized according to the publication.<sup>[1,2]</sup>

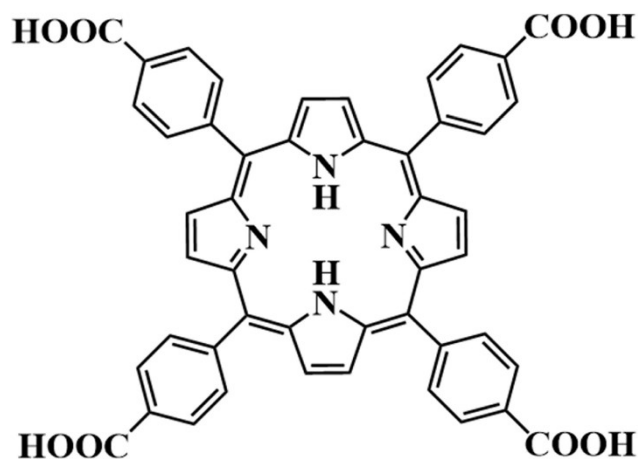

**Fig. S1.** The molecular structure of 5, 10, 15, 20-tetrakis(4-carboxylphenyl) porphyrin ( $H_2TCPP$ ).

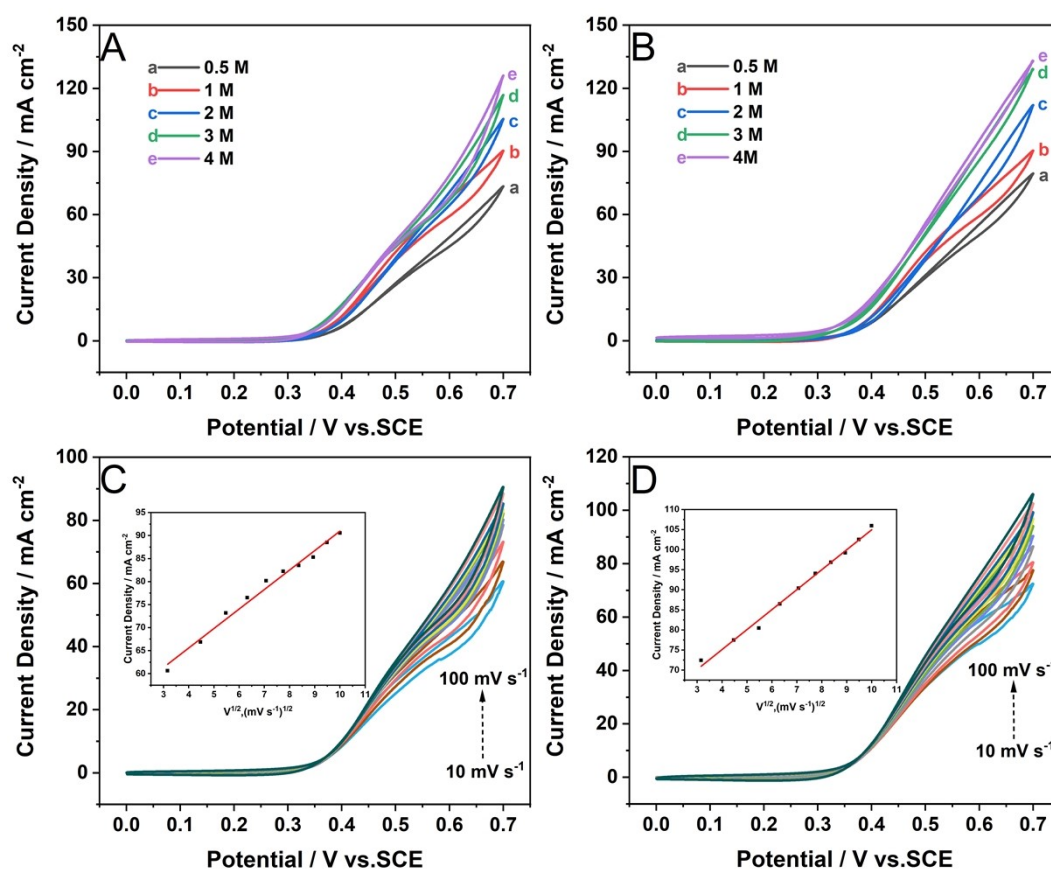

**Fig. S2.** CV curves of  $H_2TCPP/CuCo_2O_4$  for MOR with different KOH concentrations (0.5–4 M) in 1 M  $CH_3OH$  solution at  $50\text{ mV s}^{-1}$  (A). CV curves of  $H_2TCPP/CuCo_2O_4$  for MOR with different  $CH_3OH$  concentrations (0.5–4 M) in 1 M KOH solution at  $50\text{ mV s}^{-1}$  (B). CV curves of  $H_2TCPP/CuCo_2O_4$  under dark (C) and light (D) conditions for scan rates of 10–100  $\text{mV s}^{-1}$  in 1 M KOH and 1 M  $CH_3OH$  solution, and the inset is a plot of the square root of the scan rate versus the

anodic peak current density.

### **Calculation of the electrochemically active surface area**

The electrochemically active surface area (ECSA) values is an important parameter for the as-prepared nanocatalysts. We could estimate it by the bilayer capacitance ( $C_{dl}$ ) using CV curves recorded at different scan rates in the non-Faraday potential range.

The non-Faraday region is usually a potential interval with a range of 0.1 V centered on the open circuit voltage. The charging current ( $I_c$ ) is equal to the product of the  $C_{dl}$  and the scan rate  $v$ , as shown in Equation (1):

$$I_c = vC_{dl} \quad (1)$$

Therefore,  $I_c$  plotted against  $v$  can produce a straight line with a slope equal to  $C_{dl}$ . The ECSA of the catalyst can be calculated by dividing  $C_{dl}$  by the specific capacitance ( $C_s$ ) of the sample, as shown in Equation (2):

$$ECSA = C_{dl}/C_s \quad (2)$$

According to previous reports in the literature,  $C_s = 0.04 \text{ mF cm}^{-2}$  in 1 M KOH electrolyte solution.<sup>[3]</sup>

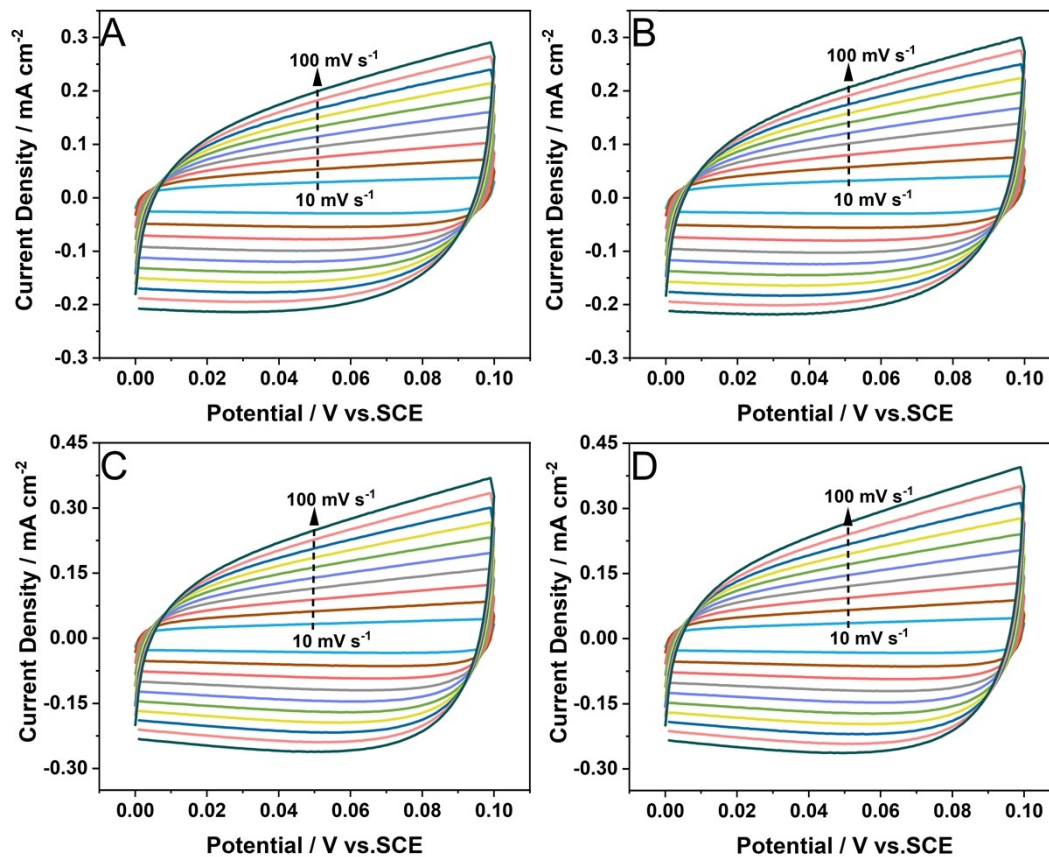

**Fig. S3.** CV curves at different scan rates in 1 M KOH electrolyte.  $\text{CuCo}_2\text{O}_4$  under dark (A) and light (B) conditions,  $\text{H}_2\text{TCPP}/\text{CuCo}_2\text{O}_4$  under dark (C) and light (D) conditions.

## Reference

1. Yang, H.; Yin, D.; Gao, L.; Zhang, X.; Zhang, X.; Liu, Q., 5,10,15,20-Tetrakis (4-carboxylphenyl) porphyrin modified nickel-cobalt layer double hydroxide nanosheets as enhanced photoelectrocatalysts for methanol oxidation under visible-light. *Journal of Colloid and Interface Science* **2020**, 561, 881-889.
2. Liu, Q.; Yang, Y.; Li, H.; Zhu, R.; Shao, Q.; Yang, S.; Xu, J., NiO nanoparticles modified with 5,10,15,20-tetrakis (4-carboxyl phenyl)-porphyrin: Promising peroxidase mimetics for  $\text{H}_2\text{O}_2$  and glucose detection. *Biosensors & Bioelectronics* **2015**, 64, 147-153.
3. McCrory, C. C. L.; Jung, S.; Peters, J. C.; Jaramillo, T. F., Benchmarking Heterogeneous

Electrocatalysts for the Oxygen Evolution Reaction. *Journal of the American Chemical Society*

**2013**, 135 (45), 16977-16987.
